# Supplementary material for: Realizing nondestructive luminescence readout in photochromic ceramics via deep ultraviolet excitation for optical information storage
Source: Royal Society of Chemistry journal article supplement (doi:10.1039/d1tc03946f), 2021-01-01
Supplement: d1tc03946f1.pdf [file d1tc03946f1.pdf]

Supporting Information

**Realizing Nondestructive Luminescence Readout in Photochromic Ceramics via Deep Ultraviolet Excitation for Optical Information Storage**

Zetian Yang, Jieqi Hu, Lisa I. D. J. Martin, David Van der Heggen\*, and Dirk Poelman\*

LumiLab, Department of Solid State Sciences, Ghent University, Krijgslaan 281-S1, B-9000, Ghent, Belgium

Corresponding Authors

David Van der Heggen: E-mail address: david.vanderheggen@ugent.be; Full postal address: LumiLab, Department of Solid State Sciences, Ghent University, Krijgslaan 281-S1, B-9000, Ghent, Belgium.

Dirk Poelman: E-mail address: dirk.poelman@ugent.be; Full postal address: LumiLab, Department of Solid State Sciences, Ghent University, Krijgslaan 281-S1, B-9000, Ghent, Belgium.

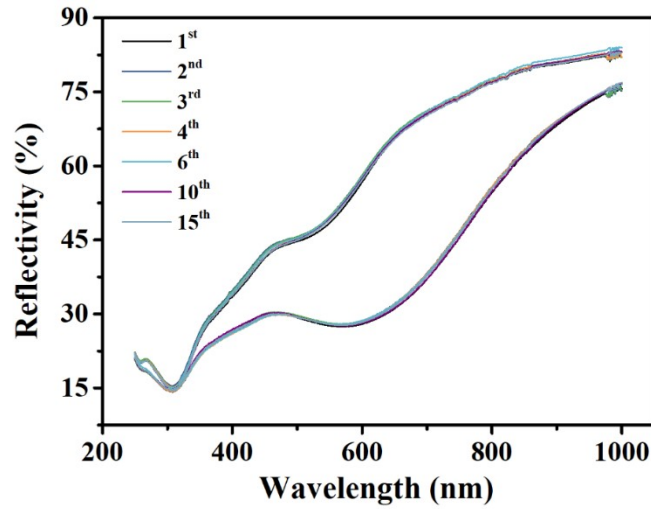

**Figure S1.** Reflectivity of  $\text{Ca}_2\text{SnO}_4:\text{Eu}$  ceramics upon alternating 280 nm and 585 nm illumination for different cycles, and the illumination time for 280 nm and 585 nm is 2 min and 5 min, respectively.

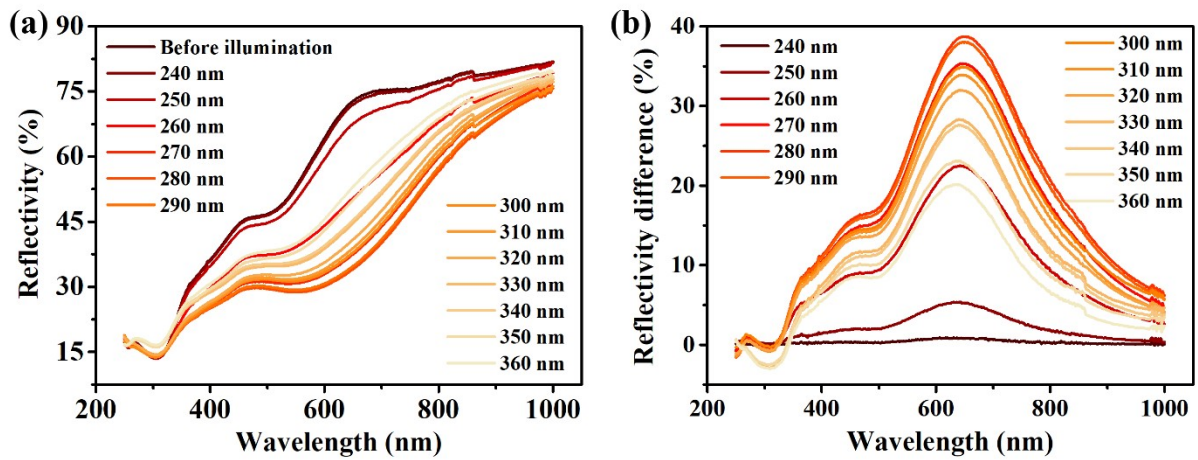

**Figure S2.** (a) Reflectivity of  $\text{Ca}_2\text{SnO}_4:\text{Eu}$  ceramics after illumination with different wavelengths. (b) Reflectivity difference of  $\text{Ca}_2\text{SnO}_4:\text{Eu}$  ceramics after illumination with different wavelengths. The illumination time of different wavelengths varies from 2 min to 5 min to ensure the sample reaches the maximum colored state.

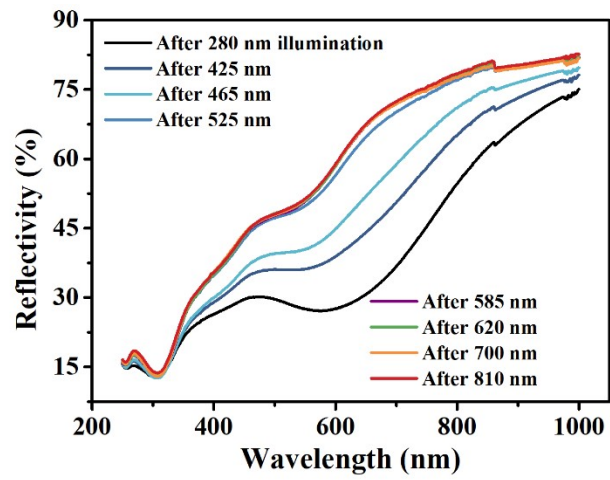

**Figure S3.** Wavelength-dependent bleaching behavior of  $\text{Ca}_2\text{SnO}_4:\text{Eu}$  ceramics. With the illumination wavelengths increase, the illumination time increases from 5 min to 30 min to ensure the sample reaches the maximum bleaching state.

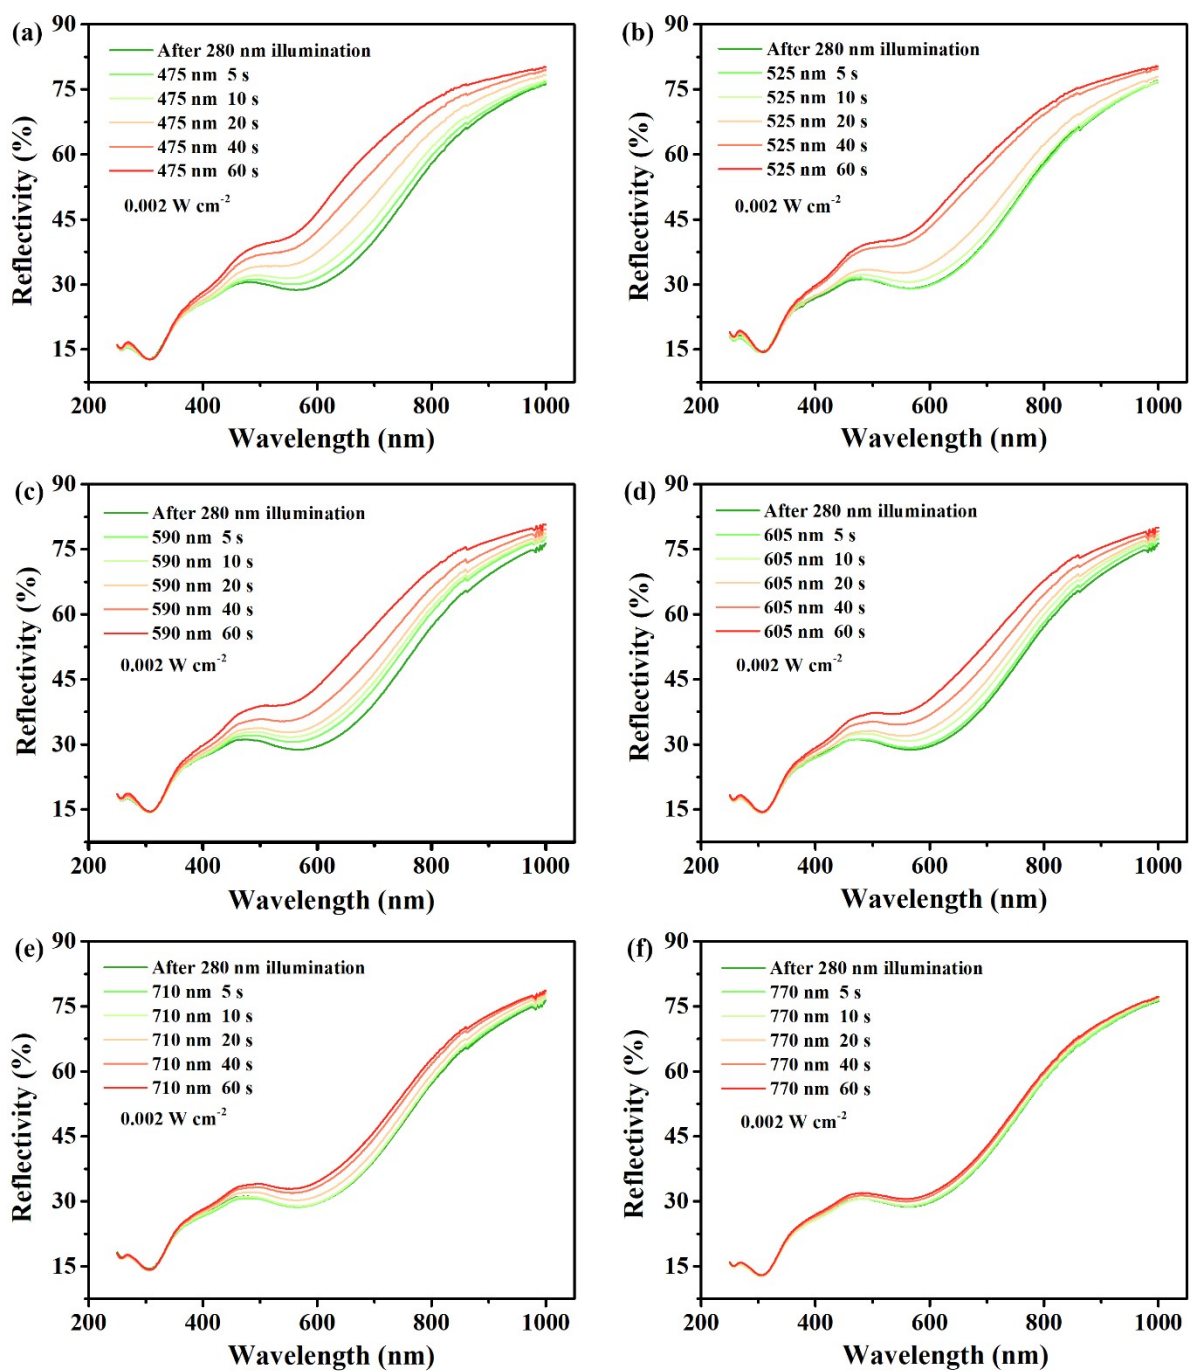

**Figure S4.** The bleaching processes of colored  $\text{Ca}_2\text{SnO}_4:\text{Eu}$  ceramics under different wavelengths illumination with the same power density (a) 475 nm, (b) 525 nm, (c) 590 nm (d) 605 nm, (e) 710 nm and (f) 770 nm.

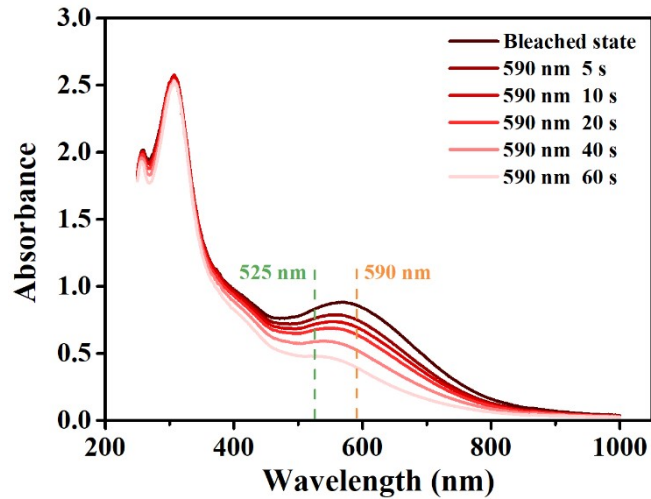

**Figure S5.** Absorption spectrum of  $\text{Ca}_2\text{SnO}_4:\text{Eu}$  ceramics after 590 nm bleaching for different durations.

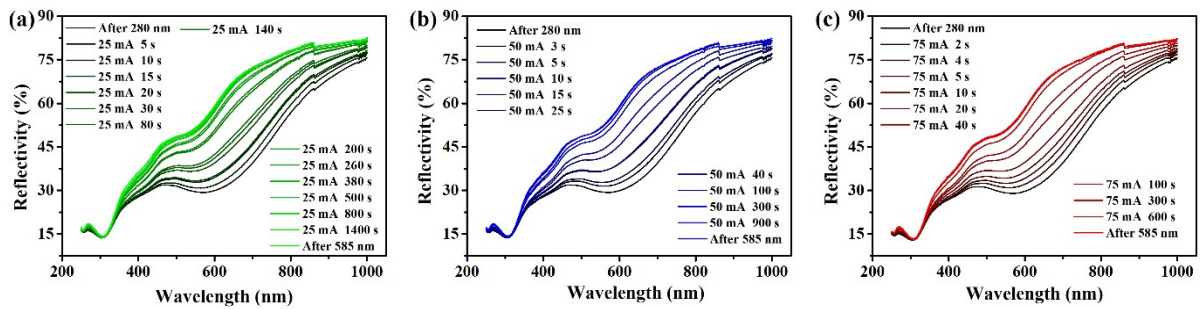

**Figure S6.** Power-dependent bleaching behavior of  $\text{Ca}_2\text{SnO}_4:\text{Eu}$  ceramics upon 620 nm illumination at (a)  $0.006 \text{ W cm}^{-2}$ , (b)  $0.013 \text{ W cm}^{-2}$  and (c)  $0.021 \text{ W cm}^{-2}$ .

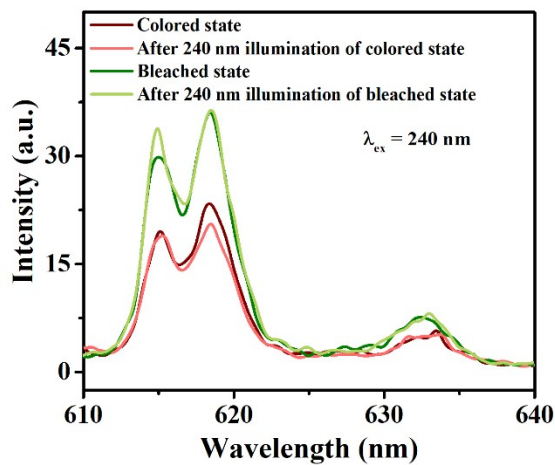

**Figure S7.** PL ( $\lambda_{\text{ex}}=240 \text{ nm}$ ) spectra of  $\text{Ca}_2\text{SnO}_4:\text{Eu}$  ceramics at room temperature in colored state, after 240 nm illumination of colored state, in bleached state and after 240 nm illumination

of bleached state with a illumination time of 2 min.

**Table S1.** The required time to reach a specific absorbance difference at 664 nm upon 620 nm illumination with different power density.

| Absorbance difference | Required time for 0.006 W cm <sup>-2</sup> | Required time for 0.013 W cm <sup>-2</sup> | Required time for 0.021 W cm <sup>-2</sup> |
|-----------------------|--------------------------------------------|--------------------------------------------|--------------------------------------------|
| 0.125                 | 6.9 s                                      | 3.4 s                                      | 2.45 s                                     |
| 0.15                  | 8.8 s                                      | 4.27 s                                     | 3.06 s                                     |
| 0.2                   | 14.02 s                                    | 6.01 s                                     | 4.27 s                                     |
| 0.25                  | 17.3 s                                     | 8.01 s                                     | 5.8 s                                      |
